# Supplementary material
Source: publisher figshare collection journal article supplement (https://diabetesjournals.figshare.com/articles/dataset/_/12497741)
Supplement: Supplementary file 1 [file 1]

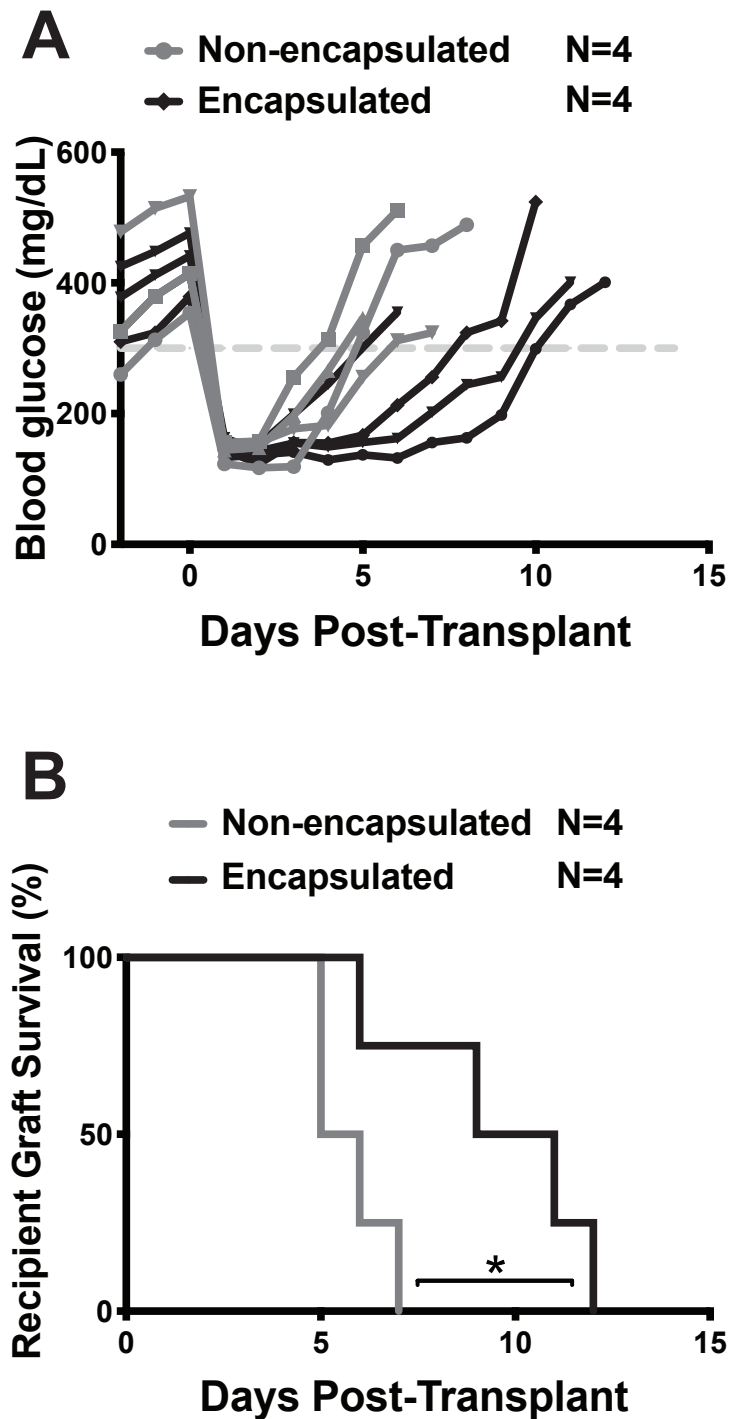

**Supplemental Figure 2: (PVPON/TA)-encapsulation of islets delays autoimmune-mediated graft rejection in spontaneously diabetic NOD mice without immunosuppression.** Blood glucose values of recent onset (less than a week diagnosis) spontaneously diabetic NOD mice before and after transplantation with 250 NOD.*scid* islets under the kidney capsule with or without (PVPON/TA) encapsulation (A). Kaplan-Meier Log-rank test for percent of spontaneously diabetic NOD recipients maintaining islet graft function and euglycemia (< 300 mg/dL) after transplantation based on blood glucose readings after transplantation (B) (n=4). \* $p < 0.05$
