# Supplementary material
Source: publisher figshare collection journal article supplement (https://diabetesjournals.figshare.com/articles/dataset/_/12497741)
Supplement: Supplementary file 2 [file 1]

**A**

| Flow Cytometry Antibodies      |            |                |
|--------------------------------|------------|----------------|
| Antibody Target                | Clone      | Company        |
| CD45 - FITC                    | 30-F11     | BioLegend      |
| L/D - Near IR                  | N/A        | ThermoFisher   |
| CD80 - PerCP-Cy5.5             | 16-10A1    | BD Biosciences |
| CD86- AF700                    | GL1        | BD Biosciences |
| CD11c - BV510                  | N418       | BioLegend      |
| CD206 - BV421                  | C068C2     | BioLegend      |
| F4/80 - PECy7                  | BM8        | eBioscience    |
| MHC-II - BV711                 | OX-6       | BD Biosciences |
| CD8a - BV421                   | 53-6.7     | BD Biosciences |
| CCL5 - PE                      | 2E9/CCL5   | BioLegend      |
| CD4 - BV510                    | RM4-5      | BD Biosciences |
| CXCR3 - FITC                   | 220803     | R&D Systems    |
| CTLA-4 - APC                   | UC10-4B9   | eBioscience    |
| TNF- PerCP-Cy5.5               | MP6-XT22   | BD Biosciences |
| Arginase1 - PE                 | polyclonal | R&D Systems    |
| Perforin - PE                  | S16009B    | BioLegend      |
| Sheep IgG Isotype - PE         | polyclonal | R&D Systems    |
| Rat IgG2a Isotype - PE         | R35-95     | BD Biosciences |
| Rat IgG1 Isotype - PerCP-Cy5.5 | R3-34      | BD Biosciences |
| Mouse IgG2b Isotype - PE       | MCP-11     | BioLegend      |

**B**

| qRT-PCR Primers |                  |
|-----------------|------------------|
| Primer Target   | Taqman Primer ID |
| <i>Gapdh</i>    | Mm99999915       |
| <i>Emr1</i>     | Mm0082529        |
| <i>Retnla</i>   | Mm00445109       |
| <i>Arg1</i>     | Mm00475988       |
| <i>Ccl2</i>     | Mm00441242       |
| <i>Ccl5</i>     | Mm01302428       |
| <i>Cxcl10</i>   | Mm00445235       |
| <i>Cxcl17</i>   | Mm00463791       |
| <i>Nos2</i>     | Mm00440502       |
| <i>Mrc1</i>     | Mm01329362       |
| <i>Cd8a</i>     | Mm01182107       |
| <i>Prf1</i>     | Mm00812512       |
| <i>Grzmb</i>    | Mm01268569       |

**C**

| Primary Immunofluorescence Antibodies |                        |                            |
|---------------------------------------|------------------------|----------------------------|
| Antibody Target                       | Dilution/Concentration | Company                    |
| Guinea Pig $\alpha$ Insulin           | (1:1000)               | Dako                       |
| Mouse $\alpha$ Glucagon               | (1:1000)               | Sigma                      |
| Chicken $\alpha$ DMPO                 | 40 $\mu$ g/mL          | Mason, R.P. et. al. (2004) |
| DAPI Fluoromount                      | N/A                    | SouthernBiotech            |
| rat $\alpha$ CD3                      | (1:250)                | BioLegend                  |

  

| Secondary Immunofluorescence Antibodies |                        |                        |
|-----------------------------------------|------------------------|------------------------|
| Antibody Target                         | Dilution/Concentration | Company                |
| Cy3 $\alpha$ Guinea Pig                 | (1:500)                | Jackson ImmunoResearch |
| Cy5 $\alpha$ Mouse                      | (1:500)                | Jackson ImmunoResearch |
| FITC $\alpha$ Chicken                   | (1:400)                | Jackson ImmunoResearch |
| Cy5 $\alpha$ Rat                        | (1:500)                | Jackson ImmunoResearch |

### **Supplementary Tables: Reagents.**

Tables of flow cytometry (A), qRT-PCR (B), and histology (C) reagents.
