# Supplementary material
Source: publisher figshare collection journal article supplement (https://diabetesjournals.figshare.com/articles/dataset/_/12497741)
Supplement: Supplementary file 3 [file 1]

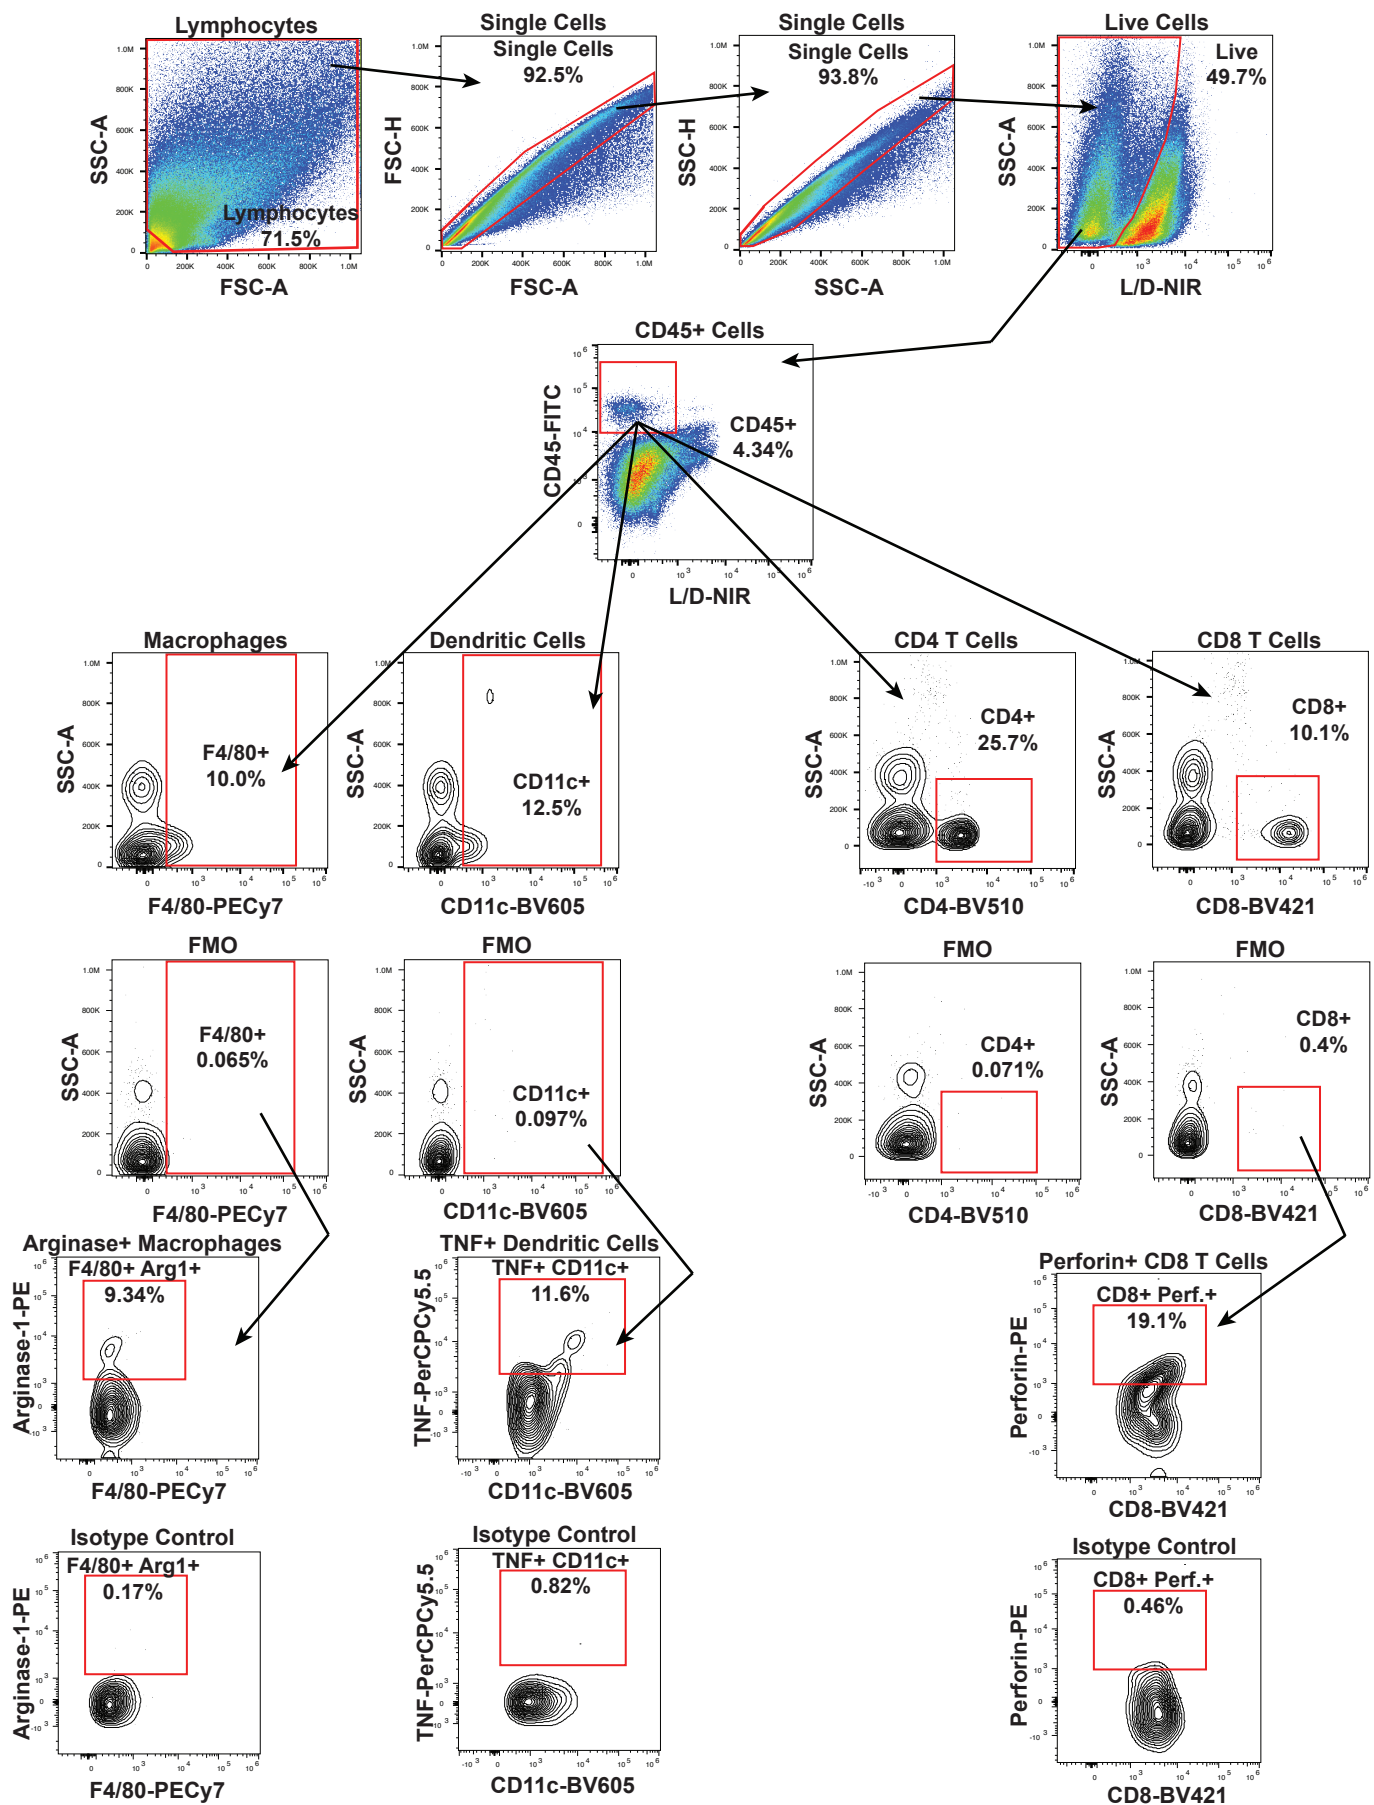

**Supplemental Figure 1: Flow cytometry gating strategy.** Islet grafts were pre-gated on single cells, live cells, and CD45<sup>+</sup> cells for immunophenotyping of macrophages (F4/80), dendritic cells (CD11c), CD4 T cells (CD4), and CD8 T cells (CD8). Fluorescence minus one (FMO) is also shown for F4/80, CD11c, CD4 T cells, and CD8 T cells and isotype controls for intracellular arginase-1, TNF, and perforin detection.
