# Supplementary material
Source: publisher figshare collection journal article supplement (https://diabetesjournals.figshare.com/articles/dataset/_/12497741)
Supplement: Supplementary file 4 [file 1]

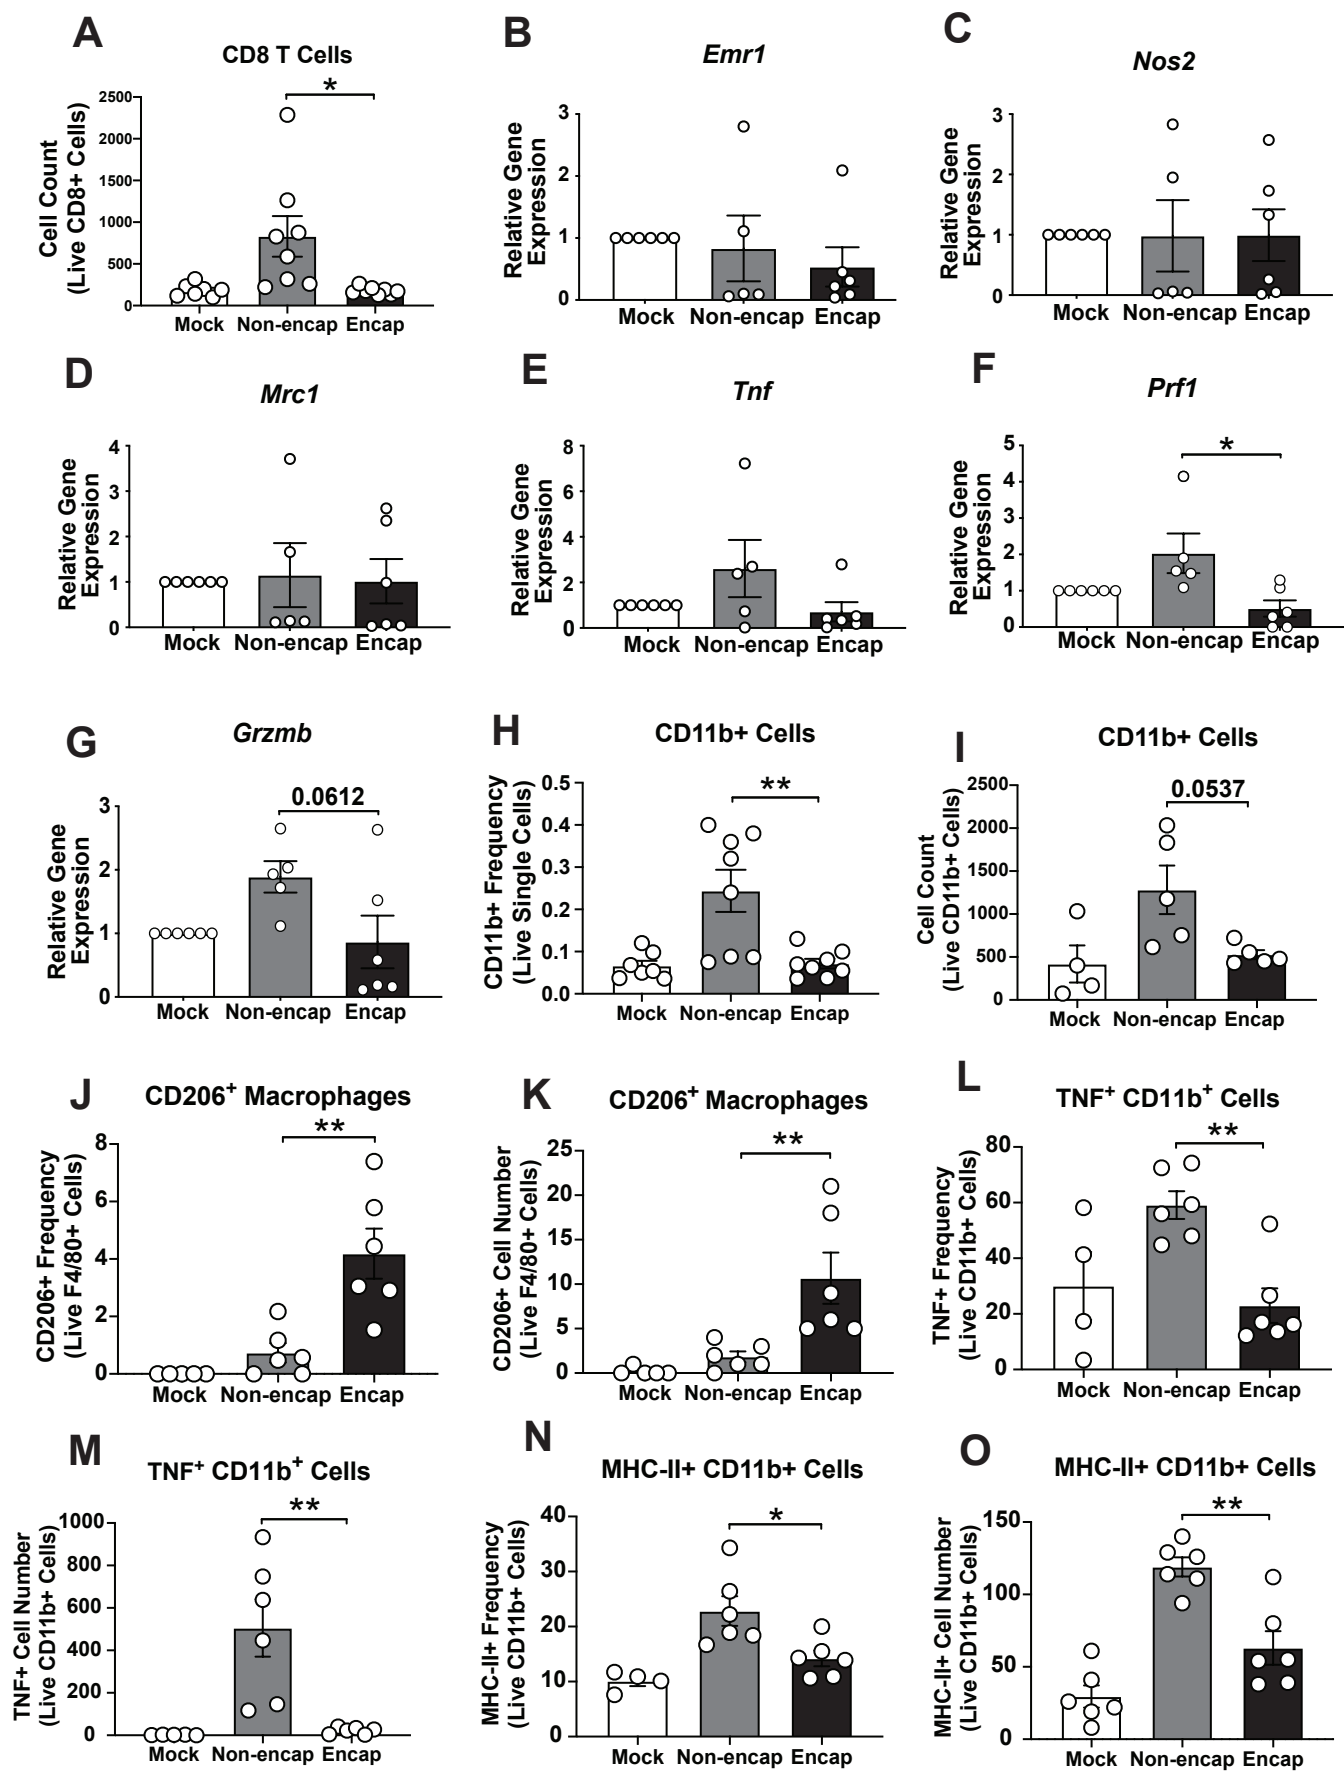

**Supplemental Figure 3: (PVPON/TA)-encapsulation of islets modulates inflammatory and anti-inflammatory responses.** NOD.*scid* islet grafts excised from STZ-treated NOD mice for flow cytometry analysis on day 7 post-transplantation for total CD8 T cell numbers (A). Allogeneic C57BL/6 islet grafts were excised from STZ-treated NOD mice and qRT-PCR analysis of *Emr1* (B), *Nos2* (C), *Mrc1* (D), *Tnf* (E), *Prf1* (F), and *Grzmb* (G) was performed (n=5-6) at day 5 post-transplantation. *Prf1* and *Grzmb* mRNA accumulation was normalized to *Cd8a*. Flow cytometry analysis of C57BL/6 islet allografts excised from STZ-treated NOD mice for the frequency (H) and cell number (I) of CD11b<sup>+</sup> cells, frequency (J) and cell number (K) of CD206<sup>+</sup> macrophages, frequency (L) and cell number (M) of TNF<sup>+</sup> CD11b<sup>+</sup> cells, and frequency (N) and cell number (O) of MHC-II<sup>+</sup> CD11b<sup>+</sup> cells (n=5-6) at day 7 post-transplantation was performed. Data represents four independent experiments. \**p*<0.05, \*\**p*<0.01.
